# Supplementary material for: Enzyme-free targeted DNA demethylation using CRISPR–dCas9-based steric hindrance to identify DNA methylation marks causal to altered gene expression
Source: Springer Nature journal article supplement (doi:10.1038/s41596-022-00741-3), 2022-10-07
Supplement: MOESM2 [file 41596_2022_741_MOESM2_ESM15.xlsx]

## Sheet: Supplementary Table 1
Sequence	PAM	Species	Genome Assembly	Strand	Genomic Coordinates	Overlapping Transcripts	Number Of Mismatches	Number Of Deletions	Number Of Insertions	Link to UCSC Genome Browser
CCATTACCAGAGCTAACTC	TGG	human	hg38	-	chr12:55745349-55745370	NM_005811	2	0	0	UcscLink
TCACTACCAGATCTAACTC	TGG	human	hg38	-	chr14:67535342-67535363	NM_020715	2	0	0	UcscLink
GCACTACCTGAGCTATCTC	AAG	human	hg38	+	chr15:43935930-43935951	NM_001286490;NR_104455;NM_032892;NM_001286491	2	0	0	UcscLink
GCACTCCCAGAGCCAACTC	TAG	human	hg38	+	chr15:66825866-66825887		2	0	0	UcscLink
GCACAACCAGAGCTAACT	AAG	human	hg38	+	chr3:27831324-27831344	NR_132438	1	1	0	UcscLink
GCACTCCAGAGCTAACT	AAG	human	hg38	-	chr14:92177497-92177516		0	2	0	UcscLink
GCACTACAGAGCTACTC	AAG	human	hg38	-	chr18:51618224-51618243		0	2	0	UcscLink
GCACACCAGAGCAACTC	GGG	human	hg38	-	chr3:157292251-157292270	NM_001167911;NM_001167912;NM_024621	0	2	0	UcscLink
GTACAACCAGAGCTAACTG	TAG	human	hg38	+	chr1:230074152-230074173	NM_004481;NM_001291866;NR_120373	3	0	0	UcscLink
GATCTACCAGCGCTAACTC	CAG	human	hg38	-	chr1:29580844-29580865		3	0	0	UcscLink
GCACTCCGAGAGCTAACGC	CAG	human	hg38	-	chr1:77779850-77779871	NM_001270384;NM_198549	3	0	0	UcscLink
TCACTAACAGAGCCAACTC	TAG	human	hg38	-	chr1:95322027-95322048		3	0	0	UcscLink
GAACCACCAGAGCAAACTC	CAG	human	hg38	+	chr11:4232972-4232993		3	0	0	UcscLink
GAACCACCAGAGCAAACTC	CAG	human	hg38	+	chr11:4278391-4278412		3	0	0	UcscLink
GAACCACCAGAGCAAACTC	CAG	human	hg38	+	chr11:4329549-4329570		3	0	0	UcscLink
GAACCACCAGAGCAAACTC	CAG	human	hg38	-	chr11:4242935-4242956		3	0	0	UcscLink
GAACCACCAGAGCAAACTC	CAG	human	hg38	-	chr11:4288378-4288399		3	0	0	UcscLink
GAACCACCAGAGCAAACTC	CAG	human	hg38	-	chr11:4339539-4339560		3	0	0	UcscLink
ACTCTACCAGAGCTACCTC	TGG	human	hg38	+	chr13:44778968-44778989		3	0	0	UcscLink
GGACTCCCAGAGCAAACTC	GGG	human	hg38	+	chr16:4235220-4235241	NM_001098814	3	0	0	UcscLink
CCACTGCCAGAGCTCACTC	AAG	human	hg38	-	chr16:56902729-56902750	NM_000339;NM_001126108;NM_001126107	3	0	0	UcscLink
GAACTACCTGTGCTAACTC	TGG	human	hg38	+	chr18:12174786-12174807		3	0	0	UcscLink
GAACTACCTGTGCTAACTC	TGG	human	hg38	-	chr18:10648448-10648469		3	0	0	UcscLink
CCACTTCCAGAGCTAATTC	CAG	human	hg38	+	chr2:105616379-105616400		3	0	0	UcscLink
GCAGTACAATAGCTAACTC	AGG	human	hg38	+	chr2:128218794-128218815		3	0	0	UcscLink
TCACTAGCAGAGCTCACTC	TGG	human	hg38	-	chr2:129370854-129370875		3	0	0	UcscLink
GCACCTCCAGAGCCAACTC	CGG	human	hg38	+	chr22:49014832-49014853		3	0	0	UcscLink
AAACTACCAAAGCTAACTC	AAG	human	hg38	-	chr3:18524634-18524655	NR_125803	3	0	0	UcscLink
GCACAATCAGAGCTAACTG	CAG	human	hg38	+	chr4:55327267-55327288		3	0	0	UcscLink
AAACTACCAGAGCTCACTC	AAG	human	hg38	-	chr5:61515067-61515088	NM_020928	3	0	0	UcscLink
GAACCACCAGAGCAAACTC	CAG	human	hg38	+	chr7:124476055-124476076		3	0	0	UcscLink
TCACAACCAGAGCTATCTC	CAG	human	hg38	-	chr7:23769739-23769760	NM_001260504;NM_031414;NM_032944;NR_048542;NM_001260505	3	0	0	UcscLink
TCACAACCAGAGCTCACTC	AAG	human	hg38	-	chr8:92978817-92978838		3	0	0	UcscLink
GTACGACCAGAGCTAGCTC	AAG	human	hg38	-	chr9:121250076-121250097		3	0	0	UcscLink
CCACTACCATGACCTAACTC	CAG	human	hg38	-	chr12:121699466-121699488		2	0	1	UcscLink
GCCCTCACCAGAGCTCACTC	AGG	human	hg38	-	chr13:22010690-22010712		2	0	1	UcscLink
GCACTACAGAGAGCTAGCTC	TGG	human	hg38	+	chr16:79830088-79830110		2	0	1	UcscLink
CCACTACCCAGAGCTCACTC	AGG	human	hg38	+	chr19:13051352-13051374	NM_002501;NM_001271044;NM_001271043	2	0	1	UcscLink
GGAGTACCAGAGCTAGACTC	AGG	human	hg38	+	chr3:27825907-27825929		2	0	1	UcscLink
GCACTTTCAGAGCGTAACTC	TGG	human	hg38	+	chr4:98904088-98904110	NM_001130679;NM_001130678;NM_001968	2	0	1	UcscLink
GCAGTTACCAGCGCTAACTC	TGG	human	hg38	+	chr6:151742501-151742523	NM_001122742	2	0	1	UcscLink
GCACATAACAGAGCTACCTC	TGG	human	hg38	-	chr9:76291472-76291494	NM_001190482	2	0	1	UcscLink
GCATCTGCCAGATCTAACTC	AGG	human	hg38	+	chrX:96567441-96567463		2	0	1	UcscLink
GCATATCAGAGCAAACTC	TAG	human	hg38	+	chr1:93152181-93152201	NM_001167830;NM_016040;NR_030761	2	1	0	UcscLink
GCAGTCCAGAGCTGACTC	AAG	human	hg38	+	chr1:115790542-115790562		2	1	0	UcscLink
GAACTACAGAGATAACTC	GGG	human	hg38	+	chr1:237818953-237818973	NM_001035	2	1	0	UcscLink
GCCTAACAGAGCAAACTC	CAG	human	hg38	-	chr1:10188439-10188459		2	1	0	UcscLink
CCAATACCAGAGCAACTC	TAG	human	hg38	-	chr1:110727674-110727694		2	1	0	UcscLink
ACACTCCAGACCTAACTC	TAG	human	hg38	+	chr11:123891893-123891913		2	1	0	UcscLink
ACACTCCACAGCTAACTC	TGG	human	hg38	-	chr11:67647407-67647427	NM_080658	2	1	0	UcscLink
GAACTAGCAGAGTAACTC	CAG	human	hg38	-	chr12:17252210-17252230		2	1	0	UcscLink
GCACTAACTGGCTAACTC	TAG	human	hg38	-	chr13:69434294-69434314		2	1	0	UcscLink
CCACTCCAGAGCTCACTC	AGG	human	hg38	-	chr14:105538669-105538689		2	1	0	UcscLink
CCACTCCAGAGCTCACTC	GAG	human	hg38	-	chr15:63385249-63385269		2	1	0	UcscLink
GCCCACCAGACCTAACTC	AAG	human	hg38	-	chr15:92973962-92973982	NM_001271	2	1	0	UcscLink
GCACTGCAGTGCTAACTC	TGG	human	hg38	+	chr18:24961861-24961881		2	1	0	UcscLink
TCACACCAGAGCTAGCTC	TAG	human	hg38	-	chr19:58398605-58398625		2	1	0	UcscLink
GCACTCTAGAGGTAACTC	TGG	human	hg38	+	chr2:35274075-35274095		2	1	0	UcscLink
ACAATACCAGAGCTAACC	TAG	human	hg38	-	chr2:186701893-186701913	NM_177454	2	1	0	UcscLink
GGAGTACCAGGCTAACTC	AGG	human	hg38	-	chr2:234443758-234443778		2	1	0	UcscLink
GCACTCCTGACCTAACTC	CAG	human	hg38	+	chr22:37185551-37185571	NM_031910;NM_182486	2	1	0	UcscLink
GCACATCATAGCTAACTC	CAG	human	hg38	+	chr3:126761486-126761506	NM_032343	2	1	0	UcscLink
GCCTACTAGAGCTAAGTC	TAG	human	hg38	+	chr3:130937835-130937855	NM_001199180;NM_014382;NM_001199185;NM_001199184;NM_001199183;NM_001199182;NM_001199179;NM_001199181;NM_001001487;NM_001001486;NM_001001485	2	1	0	UcscLink
GCACCACAGAGTTAACTC	AGG	human	hg38	-	chr4:126404134-126404154		2	1	0	UcscLink
ACATTACCAGAGCTACTC	CAG	human	hg38	-	chr4:161378722-161378742		2	1	0	UcscLink
GCAGTCCAGATCTAACTC	TGG	human	hg38	+	chr5:132434744-132434764	NR_045116	2	1	0	UcscLink
GCACTAACTGAGTAACTC	CAG	human	hg38	+	chr5:136313977-136313997	NM_020389;NM_001167577;NM_001167576;NR_133682	2	1	0	UcscLink
TCACTCCAGAGCTACCTC	TGG	human	hg38	+	chr6:7289089-7289109	NM_003144;NM_001292008;NR_120448	2	1	0	UcscLink
CCACCACCAGAGCTACTC	CAG	human	hg38	-	chr7:42685158-42685178	NR_110833	2	1	0	UcscLink
GGACACCAGAGCTAGCTC	TAG	human	hg38	-	chr7:144885099-144885119		2	1	0	UcscLink
GCATTACAGAGCTACCTC	CAG	human	hg38	+	chr8:20142358-20142378		2	1	0	UcscLink
GAGCTACCAGAGCTAACT	TGG	human	hg38	+	chr8:32740896-32740916	NM_013962;NM_001159995;NM_013956;NM_001160001;NM_001160008;NM_001160005;NM_001160004;NM_001159999;NM_013958;NM_013957;NM_013960;NM_013964;NM_013959;NM_001159996	2	1	0	UcscLink
GCAAACCAGAGCTCACTC	AAG	human	hg38	+	chr8:119148525-119148545		2	1	0	UcscLink
GCAATACAGAGATAACTC	GGG	human	hg38	+	chrX:54035481-54035501	NM_001184898;NM_001184896;NM_015107;NM_001184897	2	1	0	UcscLink
GGACACCAGAGCAAACTC	AGG	human	hg38	+	chrX:58201518-58201538		2	1	0	UcscLink
GCACTCACCACAAGCTAACTC	AAG	human	hg38	-	chr18:4143459-4143482	NM_001242761;NM_004746	1	0	2	UcscLink
GCACTAAACAGATGCTAACTC	TGG	human	hg38	-	chr3:33909642-33909665		1	0	2	UcscLink
CCACTACAGAGCTAAGCTC	AGG	human	hg38	-	chr1:24573237-24573258	NM_001010980	1	1	1	UcscLink
GCACTATCCTGGCTAACTC	CAG	human	hg38	-	chr10:72219674-72219695	NM_173473;NM_001242548;NM_001242547;NM_001242546;NR_038392;NR_038391	1	1	1	UcscLink
GCAAACCAGAGCTCAACTC	AAG	human	hg38	+	chr15:85899660-85899681		1	1	1	UcscLink
GCATAGCCAGAGGTAACTC	TAG	human	hg38	+	chr2:185101937-185101958		1	1	1	UcscLink
ACACTACCCAGAGCAACTC	CGG	human	hg38	-	chr2:224899383-224899404	NM_001290263;NM_014689	1	1	1	UcscLink
GCATACACAGAGCTATCTC	TGG	human	hg38	+	chr21:28130197-28130218	NR_126010;NR_126012	1	1	1	UcscLink
CCACTCCAGAGCTAACTAC	AAG	human	hg38	+	chr3:46915257-46915278		1	1	1	UcscLink
GCACAGCAGAGCTAACTCA	TAG	human	hg38	-	chr4:40521831-40521852	NM_001098634	1	1	1	UcscLink
GCATACCAAGAGCTAAGTC	AAG	human	hg38	+	chr6:167656415-167656436		1	1	1	UcscLink
GCACTGCTCAGAGCTAACT	TGG	human	hg38	-	chr6:46280159-46280180	NM_001251974;NM_001251973;NM_005822;NR_125838	1	1	1	UcscLink
GCCTACCCAGAGCTTACTC	AAG	human	hg38	-	chr8:91827539-91827560		1	1	1	UcscLink
GCACGCACCAGAGCTACTC	AGG	human	hg38	+	chrX:41400271-41400292		1	1	1	UcscLink
GCCTACCAAGAGCTAAGTC	CAG	human	hg38	-	chrX:14680915-14680936	NM_001118886;NM_002063;NM_001118885;NM_001171942	1	1	1	UcscLink
GCATAGCCAGAGATAACTC	AGG	human	hg38	-	chrY:16487052-16487073		1	1	1	UcscLink
GCACTCAGAGCTCACTC	CGG	human	hg38	+	chr1:2514948-2514967	NM_018216	1	2	0	UcscLink
GACTACAGAGCTAAGTC	CAG	human	hg38	+	chr10:104229235-104229254	NM_025145	1	2	0	UcscLink
GCATCCCAGAGCTAACT	AAG	human	hg38	-	chr12:31940267-31940286		1	2	0	UcscLink
TCCTACCAGAGTAACTC	AGG	human	hg38	-	chr12:104562411-104562430	NM_018413;NM_001173982	1	2	0	UcscLink
GCACCCAGAGCTATCTC	TGG	human	hg38	-	chr12:131002708-131002727	NM_198827	1	2	0	UcscLink
GTCTACCAGAGCTACTC	TAG	human	hg38	-	chr14:50871422-50871441		1	2	0	UcscLink
GCAAACCAGAGTAACTC	AGG	human	hg38	+	chr16:5524229-5524248		1	2	0	UcscLink
GCACCCAGTGCTAACTC	TAG	human	hg38	+	chr18:31343407-31343426	NM_001942;NR_110789;NR_110788	1	2	0	UcscLink
GCTACCAAAGCTAACTC	AAG	human	hg38	-	chr18:63992319-63992338		1	2	0	UcscLink
GATACCAGAGCTAACGC	CAG	human	hg38	-	chr19:33255425-33255444		1	2	0	UcscLink
GGATACCAGAGCAACTC	CAG	human	hg38	-	chr2:197505000-197505019	NM_001202485	1	2	0	UcscLink
GCACACAGAGCTCACTC	TGG	human	hg38	+	chr20:62274608-62274627	NM_001278649;NM_014835;NM_144498	1	2	0	UcscLink
GCACACAGAGCTGACTC	CAG	human	hg38	+	chr21:44982448-44982467		1	2	0	UcscLink
GCATGCCAGAGCAACTC	CAG	human	hg38	+	chr3:57201760-57201779		1	2	0	UcscLink
GCACATCAGAGCTACTC	CAG	human	hg38	+	chr3:70484650-70484669		1	2	0	UcscLink
GCAAACCAGAGCTAATC	TGG	human	hg38	+	chr3:82957175-82957194		1	2	0	UcscLink
GCACATCAGAGTAACTC	AAG	human	hg38	+	chr3:116010664-116010683	NM_002338	1	2	0	UcscLink
ACACTCCAGAGCTAACC	TGG	human	hg38	-	chr3:101505590-101505609	NM_001282804;NM_001282803;NM_001282802;NM_020654;NM_001282801;NM_001077203	1	2	0	UcscLink
GCACGCCAGAGCTAACT	TGG	human	hg38	-	chr3:156682645-156682664	NM_001184718;NM_001184717;NM_015508	1	2	0	UcscLink
GACTACAGAGCCAACTC	CAG	human	hg38	+	chr4:101782363-101782382		1	2	0	UcscLink
GCACTCAAGAGCAACTC	AGG	human	hg38	-	chr6:16542159-16542178	NM_000332;NM_001128164	1	2	0	UcscLink
GCGCACCAGAGTAACTC	GAG	human	hg38	-	chr6:135950906-135950925	NM_018945	1	2	0	UcscLink
GCACTAAAGAGCTACTC	CAG	human	hg38	-	chr6:159710591-159710610		1	2	0	UcscLink
GCCACCAGAGCTCACTC	TGG	human	hg38	+	chr9:79543259-79543278		1	2	0	UcscLink
GAACTCCAGAGTAACTC	AGG	human	hg38	-	chr9:82299353-82299372		1	2	0	UcscLink
GCATATCAGAGCTAATC	AGG	human	hg38	+	chrX:13305814-13305833		1	2	0	UcscLink
GACACCAGAGCAAACTC	AGG	human	hg38	+	chrX:58236610-58236629		1	2	0	UcscLink
GCACAACAGAGTAACTC	TAG	human	hg38	-	chrX:144905468-144905487		1	2	0	UcscLink
GCCTACAGAGCTAGACTC	TGG	human	hg38	-	chr6:60254097-60254117		0	2	1	UcscLink
GCACACAGAGCTAGACTC	TGG	human	hg38	+	chr8:58883134-58883154	NM_014729	0	2	1	UcscLink
GACTCCAGAGCTAACT	GAG	human	hg38	-	chr12:74043767-74043785		0	3	0	UcscLink
GCATCCAGAGCAACTC	TAG	human	hg38	+	chr16:23942995-23943013	NM_002738;NM_212535	0	3	0	UcscLink
GCATACAGAGCTAATC	CAG	human	hg38	-	chr16:7881567-7881585		0	3	0	UcscLink
GCATCCAGAGTAACTC	AAG	human	hg38	-	chr3:45958072-45958090	NM_024513	0	3	0	UcscLink
GCTACCAGACTAACTC	TAG	human	hg38	-	chr4:118025964-118025982		0	3	0	UcscLink
GCACTTCCAGTGCTAACTC	TAG	mouse	mm10	+	chr14:29901196-29901217		2	0	0	UcscLink
GTACCACCAGAGCTAACTC	TGG	mouse	mm10	+	chrX:52971470-52971491		2	0	0	UcscLink
GCACTAACAGTAGCTAACTC	AGG	mouse	mm10	+	chr8:64341198-64341220		1	0	1	UcscLink
CCACACCAGAGCTAACTC	AGG	mouse	mm10	-	chr10:18895605-18895625		1	1	0	UcscLink
GGACTACCAGACTAACTC	TAG	mouse	mm10	+	chr2:25405736-25405756	NM_008721	1	1	0	UcscLink
GCACAGCAGAGCTAACTC	TAG	mouse	mm10	-	chr2:142343208-142343228	NM_001013802	1	1	0	UcscLink
GCACAGCAGAGCTAACTC	TAG	mouse	mm10	+	chr3:21499391-21499411		1	1	0	UcscLink
GCCTACCAGGCTAACTC	AGG	mouse	mm10	-	chr11:72371761-72371780		0	2	0	UcscLink
GCACTACAGGCTAACTC	TAG	mouse	mm10	+	chr5:128985145-128985164	NM_001286033;NM_001286034;NM_007941	0	2	0	UcscLink
GCACTAAGAGCTAACTC	AGG	mouse	mm10	-	chr8:102120437-102120456		0	2	0	UcscLink
GCACTACTGGAACTAACTC	CAG	mouse	mm10	-	chr1:20309926-20309947	NM_153179	3	0	0	UcscLink
GGACTATCAGAGCTACCTC	TGG	mouse	mm10	-	chr1:116948075-116948096		3	0	0	UcscLink
ACACAACCAGACCTAACTC	AGG	mouse	mm10	+	chr10:45352055-45352076	NM_024285	3	0	0	UcscLink
TCAATACCAGAGATAACTC	TAG	mouse	mm10	-	chr10:126477599-126477620		3	0	0	UcscLink
GCATTCCCAGAGCTAAGTC	CAG	mouse	mm10	+	chr15:72865044-72865065	NM_029640;NM_180662;NM_001164642;NM_001164641	3	0	0	UcscLink
GCAATTCCAGAGCAAACTC	CAG	mouse	mm10	-	chr15:25341976-25341997		3	0	0	UcscLink
GAACAACCAGACCTAACTC	AGG	mouse	mm10	+	chr18:61601199-61601220		3	0	0	UcscLink
GCACTTACAGAGCTAACTT	TGG	mouse	mm10	+	chr2:127148439-127148460		3	0	0	UcscLink
GCAAAACCAGAGCTAACTT	TGG	mouse	mm10	-	chr2:133905749-133905770		3	0	0	UcscLink
GAACTTCCAGAGCTAACTG	CAG	mouse	mm10	-	chr3:107615769-107615790	NM_153563	3	0	0	UcscLink
GCTCTCCCAGAGCTAACTG	AAG	mouse	mm10	+	chr4:123177770-123177791		3	0	0	UcscLink
TCACCACCAGAGCTTACTC	AGG	mouse	mm10	+	chr4:126792166-126792187	NM_133886;NM_001035526;NM_001035525	3	0	0	UcscLink
GCACTAGAAGAGGTAACTC	TGG	mouse	mm10	-	chr4:89372366-89372387	NR_132431	3	0	0	UcscLink
ACATTACCAGACCTAACTC	CAG	mouse	mm10	-	chr6:99810560-99810581		3	0	0	UcscLink
GCAAAACCACAGCTAACTC	CAG	mouse	mm10	+	chr8:114485851-114485872	NM_019573	3	0	0	UcscLink
GAACTGCCAGAGCTGACTC	AGG	mouse	mm10	-	chrX:138384733-138384754	NM_030688	3	0	0	UcscLink
GCTCTTCCAGAGCTACACTC	TGG	mouse	mm10	-	chr1:4447154-4447176		2	0	1	UcscLink
ACACCTACCAGACCTAACTC	AAG	mouse	mm10	+	chr12:54924644-54924666	NM_013815	2	0	1	UcscLink
GCACTAGAAGAAGCTAACTC	TAG	mouse	mm10	-	chr13:106098735-106098757		2	0	1	UcscLink
GCACTAACAGGGGCTAACTC	CAG	mouse	mm10	-	chr13:112901140-112901162	NM_028151	2	0	1	UcscLink
GCAATACCAGGATCTAACTC	AGG	mouse	mm10	-	chr17:46978762-46978784	NM_001177374;NM_146078	2	0	1	UcscLink
GCCCTACCAGGAGCTAACTA	AGG	mouse	mm10	-	chr19:37605914-37605936	NM_175353	2	0	1	UcscLink
CCACATACCAGAACTAACTC	AAG	mouse	mm10	-	chr4:138402925-138402947		2	0	1	UcscLink
CCACTCCCAGAGCTAAACTC	TGG	mouse	mm10	+	chr6:148281598-148281620	NM_198967	2	0	1	UcscLink
GCACTAGTCAGAGGTAACTC	TGG	mouse	mm10	+	chr7:28412406-28412428	NM_175021	2	0	1	UcscLink
GCAGTACCCAGAGCTTACTC	AGG	mouse	mm10	-	chr7:41380050-41380072	NM_183167;NM_001199330	2	0	1	UcscLink
GCAGTACCCAGAGCTTACTC	AGG	mouse	mm10	-	chr7:41486119-41486141	NM_001033530	2	0	1	UcscLink
GACTCCCAGAGATAACTC	AGG	mouse	mm10	+	chr1:90157168-90157188		2	1	0	UcscLink
GCATTACAGAGCTAGCTC	TAG	mouse	mm10	-	chr1:20714544-20714564		2	1	0	UcscLink
TCCTACCAGGGCTAACTC	AAG	mouse	mm10	-	chr1:20790023-20790043		2	1	0	UcscLink
GCATTACAGAGCCAACTC	CAG	mouse	mm10	-	chr1:84576907-84576927	NM_152915	2	1	0	UcscLink
GCTCTACAGAGCTAGCTC	CAG	mouse	mm10	+	chr10:13204220-13204240		2	1	0	UcscLink
GCACTGGCAGAGCTACTC	AGG	mouse	mm10	+	chr10:31394550-31394570	NM_009413	2	1	0	UcscLink
GCCAACCAAAGCTAACTC	CGG	mouse	mm10	+	chr10:60597963-60597983	NM_023370;NM_001252635;NR_045556	2	1	0	UcscLink
GCATCCCACAGCTAACTC	TAG	mouse	mm10	+	chr10:66293605-66293625		2	1	0	UcscLink
GCACACAAGAGCTAACAC	AAG	mouse	mm10	+	chr10:122504937-122504957		2	1	0	UcscLink
GCACTGGCAGAGCAACTC	AGG	mouse	mm10	+	chr10:129399079-129399099		2	1	0	UcscLink
CCACACCAGAGCTAACCC	AAG	mouse	mm10	-	chr10:84143458-84143478		2	1	0	UcscLink
GCCCTCCAGAGCTAACTG	TGG	mouse	mm10	-	chr10:122221077-122221097		2	1	0	UcscLink
GAATACCAGAGCTAACTT	TGG	mouse	mm10	+	chr11:102410325-102410345		2	1	0	UcscLink
GGACTACAGAGGTAACTC	AGG	mouse	mm10	-	chr11:19205971-19205991		2	1	0	UcscLink
GCCCAACCAGGCTAACTC	CAG	mouse	mm10	+	chr12:50135035-50135055		2	1	0	UcscLink
GACTGCCAAAGCTAACTC	TGG	mouse	mm10	-	chr12:54131808-54131828		2	1	0	UcscLink
TCAATACCAGGCTAACTC	AGG	mouse	mm10	-	chr12:55550368-55550388		2	1	0	UcscLink
GCATCCCAGAGCTCACTC	AGG	mouse	mm10	-	chr12:85727681-85727701		2	1	0	UcscLink
GCAGACCAGAGCTGACTC	TAG	mouse	mm10	-	chr12:116524945-116524965	NM_011215	2	1	0	UcscLink
GAACAACCAGAGCTACTC	AAG	mouse	mm10	+	chr14:45520230-45520250	NM_146054	2	1	0	UcscLink
GCACTGGCAGAGCTACTC	AGG	mouse	mm10	+	chr14:75453942-75453962		2	1	0	UcscLink
GGACTCCAGAGCAAACTC	CAG	mouse	mm10	+	chr15:49477682-49477702		2	1	0	UcscLink
GTACTACAAGAGCTACTC	TGG	mouse	mm10	+	chr16:24561897-24561917	NM_178665;NM_001145952	2	1	0	UcscLink
GAACTACAGAGCTAGCTC	CAG	mouse	mm10	-	chr16:5944270-5944290	NM_021477	2	1	0	UcscLink
GCACAGCAGAGCTGACTC	TGG	mouse	mm10	-	chr16:31746551-31746571	NM_001252433;NM_001252434;NM_001252435;NM_007862;NR_045516	2	1	0	UcscLink
GCATATCAGAGCTAACTA	TGG	mouse	mm10	-	chr16:95118114-95118134		2	1	0	UcscLink
GAACTCCAGAGCTACCTC	AGG	mouse	mm10	+	chr17:77951125-77951145		2	1	0	UcscLink
GGACTACAGAGCTAGCTC	CAG	mouse	mm10	-	chr17:74353604-74353624	NM_001162870;NM_016962	2	1	0	UcscLink
GCACTGGCAGAGCTACTC	GGG	mouse	mm10	+	chr18:19159082-19159102		2	1	0	UcscLink
GCCCCACCAGAGCTAACC	CAG	mouse	mm10	+	chr18:74238660-74238680		2	1	0	UcscLink
GCACAGCAGAGCTAACCC	TGG	mouse	mm10	-	chr18:11105248-11105268		2	1	0	UcscLink
GCACTGGCAGAGCTACTC	AGG	mouse	mm10	-	chr18:85849155-85849175		2	1	0	UcscLink
GGACTACAGAGCTAATTC	TAG	mouse	mm10	-	chr19:21673038-21673058	NM_146096	2	1	0	UcscLink
CCACTGCCAGAGCTAATC	TGG	mouse	mm10	+	chr2:26368735-26368755	NM_001290419;NM_172339	2	1	0	UcscLink
GCACAGCAGAGCTGACTC	TGG	mouse	mm10	-	chr2:160408457-160408477		2	1	0	UcscLink
GCACTGCCGAGCTAAGTC	TAG	mouse	mm10	+	chr3:22469211-22469231		2	1	0	UcscLink
ACACTACAGAGCTGACTC	CAG	mouse	mm10	-	chr3:37874686-37874706		2	1	0	UcscLink
GCATAGCAGAGCTGACTC	TGG	mouse	mm10	+	chr4:4732171-4732191		2	1	0	UcscLink
GCACAGCAGAGCTGACTC	TGG	mouse	mm10	+	chr4:48102426-48102446		2	1	0	UcscLink
CCACACCAGAACTAACTC	CGG	mouse	mm10	+	chr4:101037371-101037391		2	1	0	UcscLink
GCACTCCTGAGCTAACCC	TAG	mouse	mm10	+	chr4:143204549-143204569	NM_001256380;NM_001081355	2	1	0	UcscLink
TAACTACCAGACTAACTC	CAG	mouse	mm10	-	chr4:77663465-77663485	NM_011211	2	1	0	UcscLink
GCAAAACCAGACTAACTC	CAG	mouse	mm10	-	chr4:130955086-130955106	NM_010769	2	1	0	UcscLink
TCCCTACCAGGCTAACTC	GGG	mouse	mm10	+	chr5:116177193-116177213	NM_177759	2	1	0	UcscLink
GGACTACAGAGCTAGCTC	TAG	mouse	mm10	+	chr5:140201083-140201103	NM_010752	2	1	0	UcscLink
GCAGAACCAGAGCTAACT	GGG	mouse	mm10	-	chr5:31474631-31474651	NM_172993	2	1	0	UcscLink
GGACTACAGAGCTAATTC	CAG	mouse	mm10	+	chr6:120052515-120052535		2	1	0	UcscLink
GCACTCAAGAGCTATCTC	TGG	mouse	mm10	-	chr6:39423411-39423431		2	1	0	UcscLink
GCACAACAGAGCTCACTC	AGG	mouse	mm10	-	chr6:61138910-61138930		2	1	0	UcscLink
GCATGCCAGAGCTAGCTC	CGG	mouse	mm10	+	chr7:48993135-48993155	NM_001111016	2	1	0	UcscLink
GCACAGCAGAGCTGACTC	TGG	mouse	mm10	+	chr7:110583899-110583919	NM_177324	2	1	0	UcscLink
GATTACCAAAGCTAACTC	AAG	mouse	mm10	+	chr8:51600530-51600550		2	1	0	UcscLink
GCTCTACAGAGCAAACTC	CAG	mouse	mm10	+	chr8:119884662-119884682		2	1	0	UcscLink
GTACTACAGAGCAAACTC	AGG	mouse	mm10	+	chr9:19656543-19656563		2	1	0	UcscLink
GCTCTACAGAGCAAACTC	TAG	mouse	mm10	-	chr9:43145953-43145973	NM_011139	2	1	0	UcscLink
GCACAACTAGAGCAACTC	TGG	mouse	mm10	+	chrX:121824872-121824892		2	1	0	UcscLink
GCACTGGCAGAGCTACTC	AGG	mouse	mm10	+	chrX:141682772-141682792	NM_007736;NM_001163155	2	1	0	UcscLink
GGACTACAGAGCTAATTC	CAG	mouse	mm10	-	chrX:151416005-151416025	NM_198105	2	1	0	UcscLink
GTACCACCAGAGCTAACT	GGG	mouse	mm10	-	chrX:154897690-154897710		2	1	0	UcscLink
GCACCTCACCAGAGCTAACTT	TAG	mouse	mm10	+	chr1:150219179-150219202		1	0	2	UcscLink
GCACTGAACCAGAGCTAACTG	GGG	mouse	mm10	+	chr4:54381513-54381536		1	0	2	UcscLink
GCACTACCACAGAGCTATCTC	CAG	mouse	mm10	+	chr8:95915346-95915369		1	0	2	UcscLink
GCACTGCCCAGAGCTAAGCTC	AGG	mouse	mm10	-	chr8:15904081-15904104	NM_053171	1	0	2	UcscLink
GCATACCTAGAGCTGACTC	CAG	mouse	mm10	-	chr1:89572062-89572083	NM_001037136;NM_178119	1	1	1	UcscLink
CCACATACCAGACTAACTC	GGG	mouse	mm10	+	chr10:31772105-31772126	NM_001013411	1	1	1	UcscLink
GACTTCCAGAGCATAACTC	CAG	mouse	mm10	-	chr11:107612577-107612598	NM_198298	1	1	1	UcscLink
GCATACCCAGGGCTAACTC	CAG	mouse	mm10	-	chr13:18299561-18299582	NM_175006	1	1	1	UcscLink
CCACTCCAGAGCTGAACTC	TAG	mouse	mm10	+	chr14:77903209-77903230		1	1	1	UcscLink
GGACTACACAGAGCAACTC	AGG	mouse	mm10	-	chr15:78912511-78912532		1	1	1	UcscLink
GTACTCCAGAGCTGAACTC	AGG	mouse	mm10	-	chr16:17408963-17408984	NM_023348	1	1	1	UcscLink
GCTCTACCAGGAGCTAACT	GAG	mouse	mm10	-	chr16:97246769-97246790		1	1	1	UcscLink
GCACTCCCATGAGCAACTC	TGG	mouse	mm10	+	chr18:34383058-34383079		1	1	1	UcscLink
GCACCCCAGAGCTGAACTC	AGG	mouse	mm10	-	chr2:28442024-28442045		1	1	1	UcscLink
GCAACTCCACAGCTAACTC	AGG	mouse	mm10	-	chr2:140994981-140995002	NM_001013802	1	1	1	UcscLink
GGACACCAGAGCTCAACTC	CGG	mouse	mm10	-	chr2:144556278-144556299	NM_001252545;NM_001252544;NM_001252543;NM_019787	1	1	1	UcscLink
GCACAACCATGAGTAACTC	CAG	mouse	mm10	+	chr3:102960225-102960246	NM_201619;NM_198658;NM_201622	1	1	1	UcscLink
GCCGACCAGAGCTCAACTC	TGG	mouse	mm10	+	chr4:108845078-108845099	NM_025334	1	1	1	UcscLink
ACACTACAGAGCTCAACTC	AAG	mouse	mm10	+	chr6:39578330-39578351	NM_178873	1	1	1	UcscLink
GCATCTACAGAGCTAATTC	CAG	mouse	mm10	-	chr6:128527479-128527500		1	1	1	UcscLink
GCCTAGCAGAGCTAAACTC	CAG	mouse	mm10	+	chr7:16246715-16246736		1	1	1	UcscLink
GCATCTCCCAGGCTAACTC	GAG	mouse	mm10	-	chr7:79748899-79748920	NM_001037927	1	1	1	UcscLink
GCGCTCCAGAGCTAACGTC	AGG	mouse	mm10	-	chr8:120100924-120100945	NM_133967	1	1	1	UcscLink
GCACTGCCGATGCTAACTC	GGG	mouse	mm10	-	chr9:57487649-57487670		1	1	1	UcscLink
CCATACCAGGCTAACTC	AAG	mouse	mm10	+	chr1:35918555-35918574		1	2	0	UcscLink
ACACTCCAGAGCTAACC	TAG	mouse	mm10	+	chr1:38950558-38950577		1	2	0	UcscLink
GATTACCAGAGCTACTC	AGG	mouse	mm10	+	chr1:62130297-62130316	NM_001081050	1	2	0	UcscLink
GCCTCCAGAGCTAACAC	TGG	mouse	mm10	-	chr1:16666590-16666609	NM_026392;NM_027415	1	2	0	UcscLink
GCCTACAGAGCTAGCTC	TAG	mouse	mm10	-	chr1:62105794-62105813	NM_001081050	1	2	0	UcscLink
GCCTACAGAGCTATCTC	CAG	mouse	mm10	-	chr1:167317609-167317628	NM_001039483	1	2	0	UcscLink
GCAGTACAGAGCTACTC	TGG	mouse	mm10	-	chr10:121258329-121258348		1	2	0	UcscLink
GACACCAGAGCTCACTC	TAG	mouse	mm10	-	chr10:124040464-124040483		1	2	0	UcscLink
GCACTCCTGGCTAACTC	TGG	mouse	mm10	+	chr11:4093556-4093575	NM_026443	1	2	0	UcscLink
GCTCTACAGAGCAACTC	TAG	mouse	mm10	+	chr11:115499300-115499319	NM_008258	1	2	0	UcscLink
GCCTACAGAGCTAATTC	CAG	mouse	mm10	-	chr11:80246488-80246507	NM_001163355;NM_001163354;NM_021536	1	2	0	UcscLink
GCCTCCCAGGCTAACTC	AAG	mouse	mm10	-	chr11:83563921-83563940		1	2	0	UcscLink
GCACTGCAGAGCTAATC	AGG	mouse	mm10	+	chr12:66954424-66954443	NM_001193266;NM_207010	1	2	0	UcscLink
GCCTCCAGTGCTAACTC	TGG	mouse	mm10	+	chr13:86805297-86805316		1	2	0	UcscLink
GCCCTCCAGAGTAACTC	TGG	mouse	mm10	-	chr13:46374310-46374329		1	2	0	UcscLink
GCACCCAAAGCTAACTC	AAG	mouse	mm10	-	chr13:51469560-51469579	NM_009167	1	2	0	UcscLink
GTACACCAGACTAACTC	GGG	mouse	mm10	-	chr13:105239282-105239301	NM_027934	1	2	0	UcscLink
TCACTACAGAGCTAACT	TGG	mouse	mm10	+	chr14:72712516-72712535		1	2	0	UcscLink
ACCTACCAGGCTAACTC	CAG	mouse	mm10	+	chr14:85209938-85209957		1	2	0	UcscLink
GCCACCAGTGCTAACTC	TGG	mouse	mm10	-	chr14:34880223-34880242	NM_008166	1	2	0	UcscLink
GCACACAGAGCAAACTC	TAG	mouse	mm10	-	chr14:101851241-101851260	NM_201529	1	2	0	UcscLink
GCACTGCAGAGCTAACT	GAG	mouse	mm10	-	chr15:27539908-27539927	NM_020332	1	2	0	UcscLink
GACTATCAGGCTAACTC	TGG	mouse	mm10	+	chr17:5578946-5578965	NM_146073	1	2	0	UcscLink
GACCACCAGAGTAACTC	TGG	mouse	mm10	+	chr17:9927533-9927552		1	2	0	UcscLink
GCTCTCCAGAGCTAACT	AGG	mouse	mm10	+	chr17:33638962-33638981	NR_028279;NM_001002842	1	2	0	UcscLink
TCACTACAGAGCTACTC	TGG	mouse	mm10	+	chr17:86386236-86386255	NM_011104	1	2	0	UcscLink
TCACACCAGAGCTAACC	TGG	mouse	mm10	+	chr19:29858891-29858910		1	2	0	UcscLink
GCCCTCCAGAGTAACTC	CAG	mouse	mm10	+	chr19:58055166-58055185	NM_181415	1	2	0	UcscLink
GACTCCAGAGCTCACTC	AGG	mouse	mm10	-	chr19:42676232-42676251		1	2	0	UcscLink
GCACACAGAGGTAACTC	GGG	mouse	mm10	+	chr2:119355774-119355793		1	2	0	UcscLink
GCACTCCCAGCTAACTC	AGG	mouse	mm10	+	chr2:181322844-181322863	NM_001166667;NM_001166668;NM_001166666;NM_001001882;NM_001166665;NR_030710	1	2	0	UcscLink
GCACATCAGGCTAACTC	CAG	mouse	mm10	-	chr2:32155589-32155608	NM_172661;NM_001159634	1	2	0	UcscLink
GATACCAGACCTAACTC	CGG	mouse	mm10	-	chr2:169795188-169795207	NM_080455	1	2	0	UcscLink
GCCTACAGAGCTAATTC	CAG	mouse	mm10	+	chr3:32503391-32503410		1	2	0	UcscLink
GCACCCCAGAGCTAACC	AGG	mouse	mm10	+	chr3:56532633-56532652		1	2	0	UcscLink
GACTCCAGAGCAAACTC	TGG	mouse	mm10	-	chr4:9148902-9148921		1	2	0	UcscLink
GCACTCAGAGCTTACTC	AGG	mouse	mm10	-	chr4:59080371-59080390		1	2	0	UcscLink
GCCTCCATAGCTAACTC	CAG	mouse	mm10	-	chr4:88426625-88426644	NM_025760	1	2	0	UcscLink
GACACCAGAGCTAACTT	AGG	mouse	mm10	-	chr4:100016254-100016273		1	2	0	UcscLink
GCACACAGAGCTAACCC	TGG	mouse	mm10	+	chr5:44389599-44389618		1	2	0	UcscLink
ACACACCAGACTAACTC	GGG	mouse	mm10	+	chr5:104736578-104736597		1	2	0	UcscLink
GCCTACAGAGCTAATTC	CAG	mouse	mm10	+	chr5:145113255-145113274		1	2	0	UcscLink
GGATACCAGGCTAACTC	CAG	mouse	mm10	-	chr5:14215493-14215512	NM_011348	1	2	0	UcscLink
GACTCCAGAGCGAACTC	CAG	mouse	mm10	+	chr6:37262530-37262549	NM_001081206	1	2	0	UcscLink
ACACACCAGACTAACTC	GGG	mouse	mm10	+	chr6:73970421-73970440		1	2	0	UcscLink
ACACACCAGACTAACTC	CAG	mouse	mm10	-	chr6:117906014-117906033	NM_001166432	1	2	0	UcscLink
GCACACAGAGCTAACTA	GAG	mouse	mm10	+	chr7:106560445-106560464		1	2	0	UcscLink
GCACTCAGTGCTAACTC	CAG	mouse	mm10	+	chr8:12834824-12834843	NM_015804;NM_001293667;NM_001293668;NR_121603	1	2	0	UcscLink
GACTACAGAACTAACTC	AGG	mouse	mm10	+	chr8:47592994-47593013		1	2	0	UcscLink
GCACTCCTGAGCTACTC	TGG	mouse	mm10	+	chr8:84229722-84229741	NM_172503	1	2	0	UcscLink
GACTCCAGGGCTAACTC	TGG	mouse	mm10	-	chr8:88923975-88923994		1	2	0	UcscLink
GCATCCAGTGCTAACTC	AGG	mouse	mm10	+	chr9:61427953-61427972		1	2	0	UcscLink
TCACTACCGAGCTAACT	GAG	mouse	mm10	+	chr9:98277985-98278004		1	2	0	UcscLink
GCTTACCAGAGTAACTC	AGG	mouse	mm10	+	chrX:151490492-151490511		1	2	0	UcscLink
GGCTACCAGACTAACTC	CAG	mouse	mm10	-	chrX:166918286-166918305		1	2	0	UcscLink
GCACTACCAATGAGCTAAACTC	CAG	mouse	mm10	+	chr12:79371993-79372017	NM_009014;NM_001252562	0	0	3	UcscLink
GCACTACCGGAGCAGCTAACTC	TAG	mouse	mm10	-	chr15:61021845-61021869		0	0	3	UcscLink
GCACTACCATTGAGCTACACTC	CAG	mouse	mm10	-	chr7:128837851-128837875		0	0	3	UcscLink
GCACTGACCAAGAGCAACTC	TGG	mouse	mm10	-	chr19:60607266-60607288		0	1	2	UcscLink
GCATACCAGGAGCAACTC	AGG	mouse	mm10	-	chr1:26578651-26578671		0	2	1	UcscLink
GCACTCCAGGAGCTAACT	GGG	mouse	mm10	+	chr10:100794392-100794412		0	2	1	UcscLink
GCATACACAGACTAACTC	CAG	mouse	mm10	-	chr13:25133159-25133179	NM_177577	0	2	1	UcscLink
GCACACAGAGCTAAGCTC	TGG	mouse	mm10	+	chr16:12702184-12702204		0	2	1	UcscLink
GCACCTACCGAGCTAACT	TGG	mouse	mm10	-	chr16:38482402-38482422	NM_009855	0	2	1	UcscLink
GACTTACCAGGCTAACTC	CAG	mouse	mm10	+	chr18:43068666-43068686		0	2	1	UcscLink
GCACACACAGAGCTACTC	CAG	mouse	mm10	-	chr6:91177811-91177831		0	2	1	UcscLink
GACTCCAGAGCTGAACTC	CAG	mouse	mm10	+	chr7:37751957-37751977	NM_172385	0	2	1	UcscLink
GACACCAGATGCTAACTC	AAG	mouse	mm10	-	chr7:77059179-77059199	NM_001199224	0	2	1	UcscLink
GACTACCCAGAGCTAATC	AGG	mouse	mm10	-	chr9:56923211-56923231	NM_175483	0	2	1	UcscLink
GCACCCAGAGCTAACC	CGG	mouse	mm10	+	chr10:11690045-11690063		0	3	0	UcscLink
GCATACAGAGCTAACC	AAG	mouse	mm10	-	chr11:13135497-13135515		0	3	0	UcscLink
GCACTCAGAGCTAACC	TGG	mouse	mm10	+	chr12:64849251-64849269		0	3	0	UcscLink
GCACACAGAGCTAACC	TAG	mouse	mm10	+	chr13:42273382-42273400		0	3	0	UcscLink
GCACTCAGAGCAACTC	TAG	mouse	mm10	-	chr13:15714504-15714522	NM_008130	0	3	0	UcscLink
GCCTACAGGCTAACTC	TAG	mouse	mm10	-	chr13:69725651-69725669	NM_001145162	0	3	0	UcscLink
GCACACAGACTAACTC	AGG	mouse	mm10	+	chr14:63782212-63782230	NM_173393	0	3	0	UcscLink
GCCACCAGAGCAACTC	AAG	mouse	mm10	+	chr16:91567612-91567630		0	3	0	UcscLink
GACTCCAGAGTAACTC	AAG	mouse	mm10	-	chr16:44493621-44493639	NM_172506	0	3	0	UcscLink
GCACTCAGGCTAACTC	TAG	mouse	mm10	-	chr16:95341082-95341100		0	3	0	UcscLink
GCACACAGACTAACTC	AAG	mouse	mm10	+	chr18:14774342-14774360		0	3	0	UcscLink
GCCTACAGAGCTAATC	AGG	mouse	mm10	-	chr2:73519428-73519446	NM_153138	0	3	0	UcscLink
GCACACAGGCTAACTC	TAG	mouse	mm10	+	chr3:148776455-148776473		0	3	0	UcscLink
GCCACCAGAGCAACTC	AGG	mouse	mm10	-	chr5:16783583-16783601		0	3	0	UcscLink
GCCTCCAGACTAACTC	CAG	mouse	mm10	-	chr6:89633483-89633501		0	3	0	UcscLink
GACTACAGAGCTACTC	CAG	mouse	mm10	-	chr8:58042906-58042924	NM_175032	0	3	0	UcscLink
GACTCCAGAGCTACTC	TGG	mouse	mm10	+	chr9:21558214-21558232	NM_021531;NM_153141	0	3	0	UcscLink
