# Supplementary material for: Enzyme-free targeted DNA demethylation using CRISPR–dCas9-based steric hindrance to identify DNA methylation marks causal to altered gene expression
Source: Springer Nature journal article supplement (doi:10.1038/s41596-022-00741-3), 2022-10-07
Supplement: MOESM3 [file 41596_2022_741_MOESM3_ESM16.xlsx]

## Sheet: Sheet1
gRNA Number	Succeeded	Failed	Success Rate
gRNA-1	2	2	0.5
gRNA-2	3	0	1
gRNA-3	2	2	0.5
gRNA-4	1	2	0.333
gRNA-5	3	0	1
gRNA-6	1	2	0.333
Total	12	8	0.6
