# Supplementary material for: Enzyme-free targeted DNA demethylation using CRISPR–dCas9-based steric hindrance to identify DNA methylation marks causal to altered gene expression
Source: Springer Nature journal article supplement (doi:10.1038/s41596-022-00741-3), 2022-10-07
Supplement: MOESM4 [file 41596_2022_741_MOESM4_ESM17.xlsx]

## Sheet: Sheet1
Instructions
1. For Anti-FLAG antibody, calculate the average Ct values for all technical replicates and insert them into the Average Ct column for each of three biological replicates per gRNA (Column C).
2. If normalizing data to a negative antibody (IgG), insert the average Ct value for all technical replicates of each sample into the Negative Antibody column. If no IgG control is included, leave this column (Column D) blank.
3. Insert the average Ct values for technical replicates of each sample into the Input column (Column E).
3. Do not modify any other cells or columns.
3. The fold enrichment of targeting vs. non-targeting gRNA samples will be calculated in the blue box and the associated p-value (Student's t-test) will be calculated in the green box.
Condition	Biological replicate	Average Ct (Anti-FLAG Antibody)	Average Ct (Negative Antibody)	Average Ct (Input)	Delta Ct	log2-transformed Ct
targeting gRNA	1				0	1
targeting gRNA	2				0	1
targeting gRNA	3				0	1
negative control gRNA	1				0	1
negative control gRNA	2				0	1
negative control gRNA	3				0	1
Fold enrichment targeting gRNA vs. control gRNA:
1
p-value (t-test):
#DIV/0!
